# Supplementary material for: Mapping biomedical concepts onto the human genome by mining literature on chromosomal aberrations
Source: PubMed Central journal article supplement — Nucleic Acids Res. 2007 Apr 1;35(8):2533–43. doi: 10.1093/nar/gkm054 (PMC1885641; doi:10.1093/nar/gkm054), 2007-04-01
Supplement: nar_gkm054_1.pdf [file nar_gkm054_1.pdf]

| Gene                | Disease                               | Reference | #Diseases | Highly Sign. | Significant | Specific | Highest rank | aBandApart concept                    | Band     | voc   | bands         | links  | docs  | p-value  |
|---------------------|---------------------------------------|-----------|-----------|--------------|-------------|----------|--------------|---------------------------------------|----------|-------|---------------|--------|-------|----------|
| <b>chromosome 1</b> |                                       |           | 5         |              |             |          |              |                                       |          |       |               |        |       |          |
| UROD                | porphyria cutanea tarda               |           |           | 1            | 1           | 0        | 1            | porphyria cutanea tarda               | 1p34.1   | omim  | <b>1p34</b>   | 1/402  | 2     | 7,00E-05 |
| GBA                 | Gaucher disease                       |           |           | 1            | 1           | 1        | 1            | Gaucher disease                       | 1q21     | omim  | <b>1q21</b>   | 13/858 | 14    | 2,40E-22 |
| GLC1A               | Glaucoma                              |           |           | 1            | 1           | 1        | 0            | Glaucoma                              | 1q24.3   | omim  | 1q24          | 24/383 | 123   | 2,21E-26 |
| HPC1                | Prostate Cancer                       |           |           | 1            | 1           | 1        | 0            | Prostate Cancer                       | 1q25.3   | omim  | 8p22          | 52/474 | 486   | 0,00E+00 |
| PS2                 | Alzheimer disease                     | D         |           | 0            | 1           | 1        | 0            | Alzheimer disease                     | 1q42.13  | omim  | 1q42.1        | 2/276  | 46    | 2,38E-03 |
|                     |                                       |           | 5         | 4            | 5           | 4        | 2            |                                       |          |       |               |        |       |          |
| <b>chromosome 2</b> |                                       |           | 4         |              |             |          |              |                                       |          |       |               |        |       |          |
| ETM2                | Essential Tremor                      | A         |           | 1            | 1           | 1        | 1            | tremor                                | 2p24.1   | omim  | <b>2p24.1</b> | 6/169  | 54    | 8,29E-10 |
| MSH2                | Colon cancer                          | B         |           | 1            | 1           | 1        | 0            | Colon cancer                          | 2p21     | omim  | 5q21          | 21/368 | 151   | 2,26E-20 |
| MSH6                | Colon cancer                          | B         |           | 1            | 1           | 1        | 0            | Colon cancer                          | 2p16.3   | see B | see B         | see B  | see B | see B    |
| PAX3                | Waardenberg syndrome                  |           |           | 1            | 1           | 1        | 1            | waardenburg syndrome                  | 2q35     | omim  | <b>2q35</b>   | 7/317  | 22    | 8,05E-11 |
|                     |                                       |           | 4         | 4            | 4           | 4        | 2            |                                       |          |       |               |        |       |          |
| <b>chromosome 3</b> |                                       |           | 4         |              |             |          |              |                                       |          |       |               |        |       |          |
| VHL                 | Von Hippel-Lindau                     |           |           | 1            | 1           | 1        | 1            | von hippel lindau disease             | 3p26-p25 | omim  | 3p26.2        | 36/284 | 77    | 0,00E+00 |
| MLH1                | Colon Cancer                          | B         |           | 1            | 1           | 1        | 0            | Colon cancer                          | 3p21.3   | omim  | see B         | see B  | see B | see B    |
| SCLC1               | Lung Cancer                           |           |           | 1            | 1           | 1        | 0            | Lung Cancer                           | 3p23-p21 | omim  | 3p14          | 49/391 | 570   | 0,00E+00 |
| ETM1                | Essential Tremor                      | A         |           | 1            | 1           | 1        | 1            | tremor                                | 3q13     | omim  | see A         | see A  | see A | see A    |
|                     |                                       |           | 4         | 4            | 4           | 4        | 2            |                                       |          |       |               |        |       |          |
| <b>chromosome 4</b> |                                       |           | 6         |              |             |          |              |                                       |          |       |               |        |       |          |
| EVC                 | Ellis-van-Crevelde                    |           |           | 1            | 1           | 1        | 1            | ellis van creveld syndrome            | 4p16     | omim  | <b>4p16</b>   | 7/229  | 11    | 1,67E-14 |
| HD                  | Huntington Disease                    |           |           | 1            | 1           | 1        | 1            | huntington disease                    | 4p16.3   | omim  | 4p16.3        | 42/311 | 63    | 0,00E+00 |
| FGFR3               | Achondroplasia                        |           |           | 1            | 1           | 1        | 1            | Achondroplasia                        | 4p16.3   | omim  | 4p16.3        | 10/311 | 17    | 2,11E-18 |
| NRCLP               | Narcolepsy                            |           |           | 1            | 1           | 1        | 1            | Narcolepsy                            | 4p13-q21 | omim  | <b>4cen</b>   | 1/57   | 6     | 2,07E-05 |
| SNCA                | Parkinson Disease                     |           |           | 1            | 1           | 1        | 0            | Parkinson Disease                     | 4q21     | omim  | 1ptel         | 4/338  | 17    | 9,72E-08 |
| FOP                 | Fibrodysplasia ossificans progressiva |           |           | 1            | 1           | 1        | 0            | Fibrodysplasia ossificans progressiva | 4q27-q31 | omim  | 17q22         | 2/400  | 5     | 5,68E-06 |

|                     |                                 |   |   |   |   |   |                           |                      |      |         |         |              |
|---------------------|---------------------------------|---|---|---|---|---|---------------------------|----------------------|------|---------|---------|--------------|
|                     |                                 | 6 | 6 | 6 | 6 | 4 |                           |                      |      |         |         |              |
| <b>chromosome 5</b> |                                 | 5 |   |   |   |   |                           |                      |      |         |         |              |
| SRD5A1              | Steroid 5-alpha reductase       | 0 | 0 | 0 | 0 | 0 | Steroid 5-alpha reductase | 5p15 / 2p23          |      |         |         |              |
| CKN1                | Cockayne syndrome               | 0 | 0 | 0 | 0 | 0 | cockayne syndrome         | 5q12                 | omim | 10q21.1 | 1/104   | 19 7,77E-04  |
| SMN1                | Spinal muscular atrophy         | 1 | 1 | 1 | 1 | 1 | spinal muscular atrophy   | 5q12.2-q13.3         | omim | 5q11.2  | 45/176  | 185 0,00E+00 |
| Asthma              | Asthma                          | 1 | 1 | 1 | 1 | 1 | asthma                    | 2q22   5q31   5q31.1 | omim | 5q31.3  | 54/384  | 252 0,00E+00 |
| DTD                 | Diastrophic dysplasia           | 1 | 1 | 1 | 0 | 0 | Diastrophic dysplasia     | 5q32-q33.1           | omim | 5q31    | 6/629   | 10 9,95E-10  |
|                     |                                 | 5 | 3 | 3 | 3 | 2 |                           |                      |      |         |         |              |
| <b>chromosome 6</b> |                                 | 5 |   |   |   |   |                           |                      |      |         |         |              |
| SCA1                | Spinocerebellar ataxia          | 1 | 1 | 1 | 0 | 0 | Spinocerebellar ataxia    | 6p23                 | omim | 12q24.1 | 16/258  | 129 1,89E-17 |
| HFE                 | Hereditary hemochromatosis      | 1 | 1 | 1 | 1 | 1 | hemochromatosis           | 6p21.3               | omim | 6p21.3  | 22/535  | 55 6,58E-29  |
| CYP21A              | Adrenal hyperplasia, congenital | 1 | 1 | 1 | 1 | 1 | adrenal hyperplasia       | 6p21.3               | omim | 6p21.3  | 7/535   | 29 7,12E-10  |
| IDDM1               | Diabetes, type 1                | 1 | 1 | 0 | 0 | 0 | diabetes                  | 6q24.31              | omim | 1q21.2  | 18/473  | 292 1,32E-10 |
| EPM2A               | Epilepsy                        | 1 | 1 | 1 | 0 | 0 | Epilepsy                  | 6q24                 | omim | 15q12   | 33/668  | 346 6,35E-18 |
|                     |                                 | 5 | 5 | 5 | 4 | 2 |                           |                      |      |         |         |              |
| <b>chromosome 7</b> |                                 | 5 |   |   |   |   |                           |                      |      |         |         |              |
| GCK                 | Diabetes, type 1                | C | 0 | 0 | 1 | 0 | diabetes mellitus         | 7p13                 | omim |         |         | 444          |
| ELN                 | Williams syndrome               |   | 1 | 1 | 1 | 1 | Williams syndrome         | 7q11.2               | omim | 7q11.23 | 88/301  | 106 0,00E+00 |
| CFTR                | Cystic fibrosis                 |   | 1 | 1 | 0 | 1 | Cystic fibrosis           | 7q31.2               | omim | 7q31    | 29/459  | 86 0,00E+00  |
| Pendrin             | Pendred syndrome                |   | 1 | 1 | 1 | 1 | Pendred syndrome          | 7q31                 | omim | 7q31    | 16/459  | 23 8,72E-28  |
| OB                  | Obesity                         |   | 1 | 1 | 1 | 0 | obesity                   | 7q31.3               |      | 15q12   | 37/668  | 289 2,17E-24 |
|                     |                                 | 5 | 4 | 4 | 4 | 3 |                           |                      |      |         |         |              |
| <b>chromosome 8</b> |                                 | 2 |   |   |   |   |                           |                      |      |         |         |              |
| WRN                 | Werner syndrome                 |   | 1 | 1 | 1 | 1 | Werner syndrome           | 8p12-p11.2           | omim | 8p12    | 17/281  | 25 1,00E-32  |
| MYC                 | Burkitt lymphoma                |   | 1 | 1 | 0 | 1 | Burkitt lymphoma          | 8q24.12-q24.13       |      | 8q24    | 21/653  | 68 4,85E-23  |
|                     |                                 | 2 | 2 | 2 | 1 | 2 |                           |                      |      |         |         |              |
| <b>chromosome 9</b> |                                 | 5 |   |   |   |   |                           |                      |      |         |         |              |
| CDKN2               | Malignant melanoma              |   | 1 | 1 | 1 | 1 | Malignant melanoma        | 9p21                 | omim | 9p21    | 40/1178 | 149 5,23E-30 |
| FRDA                | Friedreich's ataxia             |   | 1 | 1 | 1 | 1 | friedreich ataxia         | 9q13                 | omim | 9q13    | 23/189  | 27 0,00E+00  |
| ABC1                | Tangier disease                 |   | 1 | 1 | 1 | 1 | Tangier disease           | 9q22-q31             | omim | 9q31    | 6/255   | 9 1,76E-12   |
| TSC1                | Tuberous sclerosis              |   | 1 | 1 | 1 | 1 | Tuberous sclerosis        | 9q34                 | omim | 16p13.3 | 62/369  | 145 0,00E+00 |
| ABL                 | Leukemia, chronic myeloid F     |   | 1 | 1 | 0 | 1 | myeloid leukemia          | 9q34.1 / 22          | omim | 9q34    | 42/676  | 235 0,00E+00 |

|                      |                                          |   |   |   |   |   |   |                                  |                         |       |                |         |               |              |
|----------------------|------------------------------------------|---|---|---|---|---|---|----------------------------------|-------------------------|-------|----------------|---------|---------------|--------------|
|                      |                                          |   | 5 | 5 | 5 | 4 | 5 |                                  |                         |       |                |         |               |              |
| <b>chromosome 10</b> |                                          |   | 2 |   |   |   |   |                                  |                         |       |                |         |               |              |
| PAHX                 | Refsum disease                           |   | 0 | 0 | 0 | 0 | 0 | Refsum disease                   | 10p13 -- 10pter-p11.2   | omim  | xq21.1         | 1/206   | 5,49E-05      |              |
| OAT                  | Gyrate atrophy of the choroid and retina |   | 0 | 0 | 0 | 0 | 0 | chorioretinal atrophy            | 10q26                   | omim  | 6q13           | 3/142   | 11 2,38E-08   |              |
|                      |                                          |   | 2 | 0 | 0 | 0 | 0 |                                  |                         |       |                |         |               |              |
| <b>chromosome 11</b> |                                          |   | 6 |   |   |   |   |                                  |                         |       |                |         |               |              |
| HRAS                 | Harvey Ras oncogene                      |   | 0 | 1 | 1 | 0 | 0 | oncogenesis                      | 11p15.5                 |       | GO (biolo      | 13q14   | 14/773        | 187 4,45E-07 |
| IDDM2                | Diabetes, type 1                         | C | 1 | 1 | 1 | 0 | 0 | diabetes mellitus                | 11p15.5                 | see C | see C          | see C   | see C see C   |              |
| LQT                  | Long QT syndrome                         |   | 1 | 1 | 1 | 1 | 1 | long qt syndrome                 | 11p15.5                 | omim  | 11p15.5        | 32/630  | 44 0,00E+00   |              |
| VMD2                 | Best disease                             |   | 1 | 1 | 1 | 0 | 0 | vitelliform macular dystrophy    | 11q13                   | omim  | 11q12.3        | 5/180   | 9 8,74E-11    |              |
| MEN1                 | Multiple endocrine neoplasia             |   | 0 | 0 | 0 | 0 | 0 | multiple endocrine neoplasia iia | 11q13                   | omim  | 20p12.2        | 1/55    | 1 1,15E-03    |              |
| ATM                  | Ataxia telangiectasia                    |   | 1 | 1 | 1 | 1 | 1 | Ataxia telangiectasia            | 11q22.3                 | omim  | 11q23.3        | 74/559  | 0,00E+00      |              |
|                      |                                          |   | 6 | 4 | 5 | 5 | 2 |                                  |                         |       |                |         |               |              |
| <b>chromosome 12</b> |                                          |   | 2 |   |   |   |   |                                  |                         |       |                |         |               |              |
| PXR1                 | Zellweger syndrome                       |   | 0 | 0 | 0 | 0 | 0 | zellweger syndrome               | 12p13.3                 | omim  | 5q2.3          | 1/2     | 14 7,90E-08   |              |
| PAH                  | Phenylketonuria                          |   | 1 | 1 | 1 | 1 | 1 | Phenylketonuria                  | 12q24.1                 | omim  | 12q24.1        | 6/258   | 10 4,70E-12   |              |
|                      |                                          |   | 2 | 1 | 1 | 1 | 1 |                                  |                         |       |                |         |               |              |
| <b>chromosome 13</b> |                                          |   | 4 |   |   |   |   |                                  |                         |       |                |         |               |              |
| BRCA2                | Breast and ovarian cancer                | E | 1 | 1 | 1 | 1 | 1 | breast cancer                    | 13q12.3                 | omim  | 13q12          | 61/326  | 1098 0,00E+00 |              |
| CX26                 | Deafness                                 |   | 1 | 1 | 1 | 0 | 0 | Deafness                         | 13q11-q12               | omim  | xq21           | 16/242  | 293 2,87E-12  |              |
| RB1                  | Retinoblastoma                           |   | 1 | 1 | 0 | 1 | 1 | Retinoblastoma                   | 13q14.1-q14.2           | omim  | <b>13q14</b>   | 233/773 | 461 0,00E+00  |              |
| ATP7B                | Wilson's disease                         |   | 1 | 1 | 1 | 1 | 1 | Wilson disease                   | 13q14.3-q21.1           | omim  | <b>13q14.3</b> | 19/283  | 32 0,00E+00   |              |
|                      |                                          |   | 4 | 4 | 4 | 3 | 3 |                                  |                         |       |                |         |               |              |
| <b>chromosome 14</b> |                                          |   | 2 |   |   |   |   |                                  |                         |       |                |         |               |              |
| PS1 (AD3)            | Alzheimer disease                        | D | 1 | 1 | 1 | 1 | 1 | Alzheimer disease                | 14q24.3                 | omim  | <b>14q24.3</b> | 7/265   | 46 1,60E-10   |              |
| SERPINA1             | Alpha-1-antitrypsin deficiency           |   | 0 | 0 | 0 | 0 | 0 |                                  | 14q32.1                 |       |                |         |               |              |
|                      |                                          |   | 2 | 1 | 1 | 1 | 1 |                                  |                         |       |                |         |               |              |
| <b>chromosome 15</b> |                                          |   | 4 |   |   |   |   |                                  |                         |       |                |         |               |              |
| SNRPN                | Prader-Willi syndrome                    |   | 1 | 1 | 1 | 1 | 1 | prader willi syndrome            | 15q12, 15q11-q13, 15q11 | omim  | <b>15q11</b>   | 249/638 | 310 0,00E+00  |              |
| UBE3A                | Angelman syndrome                        |   | 1 | 1 | 1 | 1 | 1 | Angelman syndrome                | 15q11-q13, Xq28         | omim  | <b>15q11</b>   | 214/638 | 249 0,00E+00  |              |
| FBN1                 | Marfan syndrome                          |   | 1 | 1 | 1 | 1 | 1 | marfan syndrome                  | 15q21.1                 | omim  | <b>15q21.1</b> | 22/143  | 47 0,00E+00   |              |



|       |                                 |          |          |          |          |                                 |                          |       |                |          |       |          |
|-------|---------------------------------|----------|----------|----------|----------|---------------------------------|--------------------------|-------|----------------|----------|-------|----------|
| SGLT1 | Glucose galactose malabsorption | 1        | 1        | 1        | 1        | glucose galactose malabsorption | 22q13.1                  | omim  | <b>22q13.1</b> | 2/265    | 2     | 3,04E-05 |
| DGS   | DiGeorge syndrome               | 1        | 1        | 1        | 1        | DiGeorge syndrome               | 22q11.2                  | omim  | <b>22q11</b>   | 156/1092 | 242   | 0,00E+00 |
| NF2   | Neurofibromatosis               | 1        | 1        | 1        | 0        | Neurofibromatosis               | 22q12.2                  | omim  | <b>22q12</b>   | 42/405   | 212   | 0,00E+00 |
| BCR   | Leukemia, chronic myeloid F     | 1        | 1        | 1        | 1        | myeloid leukemia                | <b>22q11.21</b> / 9q34.1 | see F | see F          | see F    | see F | see F    |
|       |                                 | <b>4</b> | <b>4</b> | <b>4</b> | <b>4</b> | <b>3</b>                        |                          |       |                |          |       |          |

**chromosome X**

11

|        |                                     |           |           |           |           |                                     |            |       |               |         |       |          |
|--------|-------------------------------------|-----------|-----------|-----------|-----------|-------------------------------------|------------|-------|---------------|---------|-------|----------|
| PIG-A  | Paroxysmal nocturnal hemoglobinuria | 1         | 1         | 1         | 1         | Paroxysmal nocturnal hemoglobinuria | Xp22.1     | omim  | <b>xp22.1</b> | 2/174   | 5     | 4,66E-07 |
| DMD    | Duchenne muscular dystrophy         | 1         | 1         | 1         | 0         | duchenne muscular dystrophy         | Xp21.2     | omim  | xp21          | 121/360 | 181   | 0,00E+00 |
| ATP7A  | Menkes syndrome                     | 1         | 1         | 1         | 1         | menkes disease                      | Xq12-q13   | omim  | xq13.3        | 14/243  | 21    | 5,63E-28 |
| COL4A5 | Alport syndrome                     | 1         | 1         | 1         | 0         | alport syndrome                     | Xq22.3     | omim  | xq22          | 27/292  | 50    | 0,00E+00 |
| IL2RG  | Severe combined immunod G           | 1         | 1         | 1         | 0         | scid                                | Xq13       | see G | see G         | see G   | see G | see G    |
| TNFSF5 | Immunodeficiency with hyper-IgM     | 1         | 1         | 1         | 1         | hyper igm                           | Xq26       | omim  | xq26          | 9/336   | 13    | 2,54E-17 |
| HPRT1  | Lesch-Nyhan syndrome                | 1         | 1         | 1         | 1         | lesch nyhan syndrome                | Xq26-q27.2 | omim  | <b>xq26.2</b> | 1/228   | 2     | 2,25E-05 |
| FMR1   | Fragile X syndrome                  | 1         | 1         | 1         | 1         | fragile x syndrome                  | Xq27.3     | omim  | xq27          | 49/416  | 170   | 0,00E+00 |
| ALD    | Adrenoleukodystrophy                | 1         | 1         | 1         | 1         | Adrenoleukodystrophy                | Xq28       | omim  | <b>xq28</b>   | 31/908  | 39    | 0,00E+00 |
| MECP2  | Rett syndrome                       | 1         | 1         | 1         | 1         | rett syndrome                       | Xq28, Xp22 | omim  | <b>xq28</b>   | 41/908  | 76    | 0,00E+00 |
| HEMA   | Hemophilia A                        | 1         | 1         | 1         | 1         | Hemophilia                          | Xq28       | omim  | <b>xq28</b>   | 2/908   | 3     | 6,75E-06 |
|        |                                     | <b>11</b> | <b>11</b> | <b>11</b> | <b>11</b> | <b>8</b>                            |            |       |               |         |       |          |

**chromosome Y**

1

|     |                                      |          |          |          |          |                   |        |         |      |        |    |          |
|-----|--------------------------------------|----------|----------|----------|----------|-------------------|--------|---------|------|--------|----|----------|
| SRY | Sex determination / Testes-determini | 1        | 1        | 1        | 0        | sex determination | Yp11.3 | GO biol | xp21 | 10/360 | 39 | 2,61E-13 |
|     |                                      | <b>1</b> | <b>1</b> | <b>1</b> | <b>1</b> | <b>0</b>          |        |         |      |        |    |          |

**number of diseases**      93   80   84   79   57
