# Supplementary material for: Mapping biomedical concepts onto the human genome by mining literature on chromosomal aberrations
Source: PubMed Central journal article supplement — Nucleic Acids Res. 2007 Apr 1;35(8):2533–43. doi: 10.1093/nar/gkm054 (PMC1885641; doi:10.1093/nar/gkm054), 2007-04-01
Supplement: nar_gkm054_2.pdf [file nar_gkm054_2.pdf]

| category (Brewer et al.) |                             | malformation | highly significantly associated bands (<0,001) | deletion / duplication | aBandApart # docs | aBandApart Highly Significant | aBandApart Significant | aBandApart Insignificant | no literature cocites band and concept |
|--------------------------|-----------------------------|--------------|------------------------------------------------|------------------------|-------------------|-------------------------------|------------------------|--------------------------|----------------------------------------|
| cardiac                  | aortic stenosis             | 11q23-24     | DEL                                            | 39                     | 0                 | 0                             | 0                      | 1                        |                                        |
| cardiac                  | hypoplastic left heart      | 11q23-25     | DEL                                            | 8                      | 1                 | 1                             | 1                      |                          |                                        |
| cardiac                  | hypoplastic left heart      | 16q11-12     | DUP                                            | 8                      | 0                 | 0                             | 0                      | 1                        |                                        |
| cardiac                  | patent ductus arteriosus    | 16q22        | DUP                                            | 33                     | 1                 | 1                             | 1                      |                          |                                        |
| cardiac                  | pulmonary stenosis          | 20p13-11     | DEL                                            | 16                     | 1                 | 1                             | 1                      |                          |                                        |
| cardiac                  | pulmonary stenosis          | 22q11        | DEL                                            | 16                     | 1                 | 1                             | 1                      |                          |                                        |
| cardiac                  | pulmonary stenosis          | 8q22-24      | DUP                                            | 16                     | 0                 | 0                             | 0                      | 1                        |                                        |
| cardiac                  | tetralogy of fallot         | 8q22-24      | DUP                                            | 101                    | 1                 | 1                             | 1                      |                          |                                        |
| cardiac                  | truncus arteriosus          | 22q11        | DEL                                            | 47                     | 1                 | 1                             | 1                      |                          |                                        |
| cardiac                  | truncus arteriosus          | 2q22         | DEL                                            | 47                     | 0                 | 0                             | 0                      | 1                        |                                        |
| cardiac                  | ventricular septal defect   | 22q11        | DEL                                            | 75                     | 1                 | 1                             | 1                      |                          |                                        |
| cardiac                  | ventricular septal defect   | 4q31         | DEL                                            | 75                     | 0                 | 1                             | 1                      |                          |                                        |
| cardiac                  | ventricular septal defect   | 8q24         | DUP                                            | 75                     | 0                 | 1                             | 1                      |                          |                                        |
| cns                      | agenesis of corpus callosum | 1q42-43      | DEL                                            | 7                      | 0                 | 0                             | 0                      | 0                        |                                        |
| cns                      | agenesis of corpus callosum | 8p23-21      | DUP                                            | 7                      | 1                 | 1                             | 1                      |                          |                                        |
| cns                      | craniosynostosis            | 7p21-15      | DEL                                            | 86                     | 1                 | 1                             | 1                      |                          |                                        |
| cns                      | holoprosencephaly           | 13q33-34     | DEL                                            | 84                     | 1                 | 1                             | 1                      |                          |                                        |
| cns                      | holoprosencephaly           | 18p11        | DEL                                            | 84                     | 1                 | 1                             | 1                      |                          |                                        |
| cns                      | holoprosencephaly           | 2p21         | DEL                                            | 84                     | 1                 | 1                             | 1                      |                          |                                        |
| cns                      | holoprosencephaly           | 7q32-34      | DEL                                            | 84                     | 0                 | 1                             | 1                      |                          |                                        |
| cns                      | holoprosencephaly           | 7q36         | DEL                                            | 84                     | 1                 | 1                             | 1                      |                          |                                        |
| cns                      | lissencephaly               | 17p13        | DEL                                            | 90                     | 1                 | 1                             | 1                      |                          |                                        |
| cns                      | microcephaly (prenatal)     | 4p16-15      | DEL                                            | 318                    | 1                 | 1                             | 1                      |                          |                                        |
| cns                      | trigonocephaly              | 11q23-25     | DEL                                            | 34                     | 1                 | 1                             | 1                      |                          |                                        |
| cns                      | trigonocephaly              | 13q21-34     | DUP                                            | 34                     | 0                 | 0                             | 0                      | 1                        |                                        |
| cns                      | trigonocephaly              | 9p24-21      | DEL                                            | 34                     | 1                 | 1                             | 1                      |                          |                                        |
| craniofacial             | choanal atresia             | 7p22-15      | DUP                                            | 10                     | 1                 | 1                             | 1                      |                          |                                        |
| craniofacial             | cleft lip                   | 10p15-11     | DUP                                            | 119                    | 1                 | 1                             | 1                      |                          |                                        |
| craniofacial             | cleft lip                   | 1q25         | DEL                                            | 119                    | 0                 | 0                             | 1                      |                          |                                        |
| craniofacial             | cleft lip                   | 3p26-21      | DUP                                            | 119                    | 0                 | 0                             | 1                      |                          |                                        |
| craniofacial             | cleft lip                   | 4q31-35      | DEL                                            | 119                    | 1                 | 1                             | 1                      |                          |                                        |
| craniofacial             | cleft palate                | 4p16-14      | DEL                                            | 255                    | 0                 | 0                             | 1                      |                          |                                        |
| craniofacial             | cleft palate                | 4q31-35      | DEL                                            | 255                    | 1                 | 1                             | 1                      |                          |                                        |
| craniofacial             | micrognathia                | 4p16-15      | DEL                                            | 142                    | 1                 | 1                             | 1                      |                          |                                        |

|                   |                        |          |     |     |   |   |   |   |
|-------------------|------------------------|----------|-----|-----|---|---|---|---|
| gastrointestinal  | anal atresia           | 13q22-34 | DEL | 17  | 1 | 1 | 1 |   |
| gastrointestinal  | intestinal malrotation | 11p11-15 | DUP | 7   | 0 | 0 | 0 | 1 |
| gastrointestinal  | small-bowel atresia    | 15q12    | DUP | 13  | 0 | 0 | 0 | 1 |
| genitourinary     | ambiguous genitalia    | 11p13    | DEL | 23  | 0 | 1 | 1 |   |
| genitourinary     | ambiguous genitalia    | 13q31-34 | DEL | 23  | 1 | 1 | 1 |   |
| genitourinary     | cryptorchidism         | 10p15-14 | DEL | 1   | 0 | 0 | 0 | 1 |
| genitourinary     | cryptorchidism         | 11p13    | DEL | 1   | 1 | 1 | 1 |   |
| genitourinary     | inguinal hernia        | 7q11-12  | DEL | 8   | 0 | 0 | 0 | 1 |
| genitourinary     | renal agenesis         | 1q31     | DEL | 28  | 0 | 0 | 0 | 1 |
| ocular            | aniridia               | 11p13    | DEL | 156 | 1 | 1 | 1 |   |
| ocular            | anophthalmia           | 14q22-23 | DEL | 13  | 1 | 1 | 1 |   |
| ocular            | cataract               | 11p13    | DEL | 100 | 0 | 1 | 1 |   |
| ocular            | coloboma               | 4p16-14  | DEL | 37  | 1 | 1 | 1 |   |
| ocular            | glaucoma               | 11p13    | DEL | 123 | 1 | 1 | 1 |   |
| ocular            | glaucoma               | 14q13-21 | DEL | 123 | 0 | 1 | 1 |   |
| ocular            | glaucoma               | 3q22     | DUP | 123 | 1 | 1 | 1 |   |
| ocular            | glaucoma               | 3q25-29  | DUP | 123 | 1 | 1 | 1 |   |
| ocular            | microphthalmia         | 13q22-34 | DEL | 90  | 0 | 1 | 1 |   |
| skeletal and limb | absent sacrum          | 7q36     | DEL | 1   | 1 | 1 | 1 |   |
| skeletal and limb | pectus excavatum       | 15q23-26 | DUP | 16  | 0 | 0 | 0 | 1 |
| skeletal and limb | postaxial polydactyly  | 13q14-34 | DUP | 27  | 1 | 1 | 1 |   |
| skeletal and limb | postaxial polydactyly  | 17q23-25 | DUP | 27  | 1 | 1 | 1 |   |
| skeletal and limb | postaxial polydactyly  | 3p25     | DEL | 27  | 0 | 1 | 1 |   |
| skeletal and limb | scoliosis              | 10q25-26 | DUP | 75  | 0 | 0 | 1 |   |
| skeletal and limb | scoliosis              | 4p16-11  | DUP | 75  | 0 | 1 | 1 |   |
| skeletal and limb | split hand             | 7q21-22  | DEL | 37  | 1 | 1 | 1 |   |
| skeletal and limb | syndactyly of fingers  | 9p11-24  | DUP | 4   | 0 | 0 | 0 | 1 |
| skeletal and limb | talipes equinovarus    | 10p15-11 | DUP | 12  | 0 | 0 | 0 | 1 |
| skeletal and limb | talipes equinovarus    | 6q25     | DUP | 12  | 0 | 0 | 0 | 1 |

35 44 48 14
